# Supplementary material for: Rethinking how and when to report descriptions of behavior change content within interventions: a case study of an ongoing physical activity trial (ready steady 3.0)
Source: PubMed Central journal article supplement — Transl Behav Med. 2023 Feb 9;13(6):368–79. doi: 10.1093/tbm/ibac092 (PMC10255763; doi:10.1093/tbm/ibac092), 2023-02-09
Supplement: ibac092_suppl_supplementary_table_s1.pdf [file ibac092_suppl_supplementary_table_s1.pdf]

Supplementary Table 1. Intervention Content by Condition, and Main Components: Ready Steady 3.0

| Intervention Content Component                     | Primary BCTs<br>Supplementary BCTs                    | Intervention Conditions (Intervention Packages) |                      |                  |                  |                      |                  |                  |                      |                  |                  |                      |                  |
|----------------------------------------------------|-------------------------------------------------------|-------------------------------------------------|----------------------|------------------|------------------|----------------------|------------------|------------------|----------------------|------------------|------------------|----------------------|------------------|
|                                                    |                                                       | 1                                               |                      |                  | 2                |                      |                  | 3                |                      |                  | 4                |                      |                  |
|                                                    |                                                       | Duration (weeks)                                | Frequency (contacts) | Amount (minutes) | Duration (weeks) | Frequency (contacts) | Amount (minutes) | Duration (weeks) | Frequency (contacts) | Amount (minutes) | Duration (weeks) | Frequency (contacts) | Amount (minutes) |
| Interpersonal Behavior Change                      | <b>1.2 Problem Solving (Environment)</b>              | 0                                               | 0                    | 0                |                  |                      | <b>32</b>        | 0                | 0                    | 0                |                  |                      | <b>25</b>        |
|                                                    | NA. Information                                       | 0                                               | 0                    | 0                |                  |                      | 4                | 0                | 0                    | 0                |                  |                      | 5                |
|                                                    | 6.2 Social comparison                                 | 0                                               | 0                    | 0                |                  |                      |                  | 0                | 0                    | 0                |                  |                      |                  |
|                                                    | 12.2 Restructuring the Social Environment             | 0                                               | 0                    | 0                | 7                | 2                    | 22               | 0                | 0                    | 0                | 7                | 2                    | 16               |
|                                                    | 8.1 Behavioral Practice/Rehearsal                     | 0                                               | 0                    | 0                |                  |                      |                  | 0                | 0                    | 0                |                  |                      |                  |
|                                                    | 4.4 Behavioral Experiments                            | 0                                               | 0                    | 0                |                  |                      |                  | 0                | 0                    | 0                |                  |                      |                  |
|                                                    | 8.6 Generalization of Behavior                        | 0                                               | 0                    | 0                |                  |                      | 6                | 0                | 0                    | 0                |                  |                      | 4                |
|                                                    | 0                                                     | 0                                               | 0                    |                  |                  | 0                    | 0                | 0                | 0                    |                  |                  | 0                    |                  |
| <b>6.2 Social Comparison</b>                       | 0                                                     | 0                                               | 0                    |                  |                  | <b>30</b>            | 0                | 0                | 0                    |                  |                  | <b>30</b>            |                  |
| NA. Information                                    | 0                                                     | 0                                               | 0                    |                  |                  | 4                    | 0                | 0                | 0                    |                  |                  | 4                    |                  |
| 3.1 Social Support (unspecified)                   | 0                                                     | 0                                               | 0                    | 6                | 2                | 19                   | 0                | 0                | 0                    | 6                | 2                | 19                   |                  |
| 8.1 Behavioral Practice/ Rehearsal                 | 0                                                     | 0                                               | 0                    |                  |                  |                      | 0                | 0                | 0                    |                  |                  |                      |                  |
| 8.6 Generalization of Behavior                     | 0                                                     | 0                                               | 0                    |                  |                  | 7                    | 0                | 0                | 0                    |                  |                  | 7                    |                  |
| <b>7.1 Prompts and cues for exercise</b>           | 0                                                     | 0                                               | 0                    |                  |                  | <b>30</b>            | 0                | 0                | 0                    |                  |                  | <b>30</b>            |                  |
| NA. Information                                    | 0                                                     | 0                                               | 0                    |                  |                  | 6                    | 0                | 0                | 0                    |                  |                  | 6                    |                  |
| 6.2 Social Comparison                              | 0                                                     | 0                                               | 0                    | 5                | 2                | 16                   | 0                | 0                | 0                    | 5                | 2                | 16                   |                  |
| 1.2 Problem solving                                | 0                                                     | 0                                               | 0                    |                  |                  |                      | 0                | 0                | 0                    |                  |                  |                      |                  |
| 8.1 Behavioral Practice/ Rehearsal                 | 0                                                     | 0                                               | 0                    |                  |                  |                      | 0                | 0                | 0                    |                  |                  |                      |                  |
| 8.6 Generalization of Behavior                     | 0                                                     | 0                                               | 0                    |                  |                  | 8                    | 0                | 0                | 0                    |                  |                  | 8                    |                  |
| <b>3.1 Social Support (unspecified)</b>            | 0                                                     | 0                                               | 0                    |                  |                  | <b>17</b>            | 0                | 0                | 0                    |                  |                  | <b>17</b>            |                  |
| NA. Information                                    | 0                                                     | 0                                               | 0                    |                  |                  | 2                    | 0                | 0                | 0                    |                  |                  | 2                    |                  |
| 6.2 Social Comparison                              | 0                                                     | 0                                               | 0                    | 4                | 1                | 12                   | 0                | 0                | 0                    | 4                | 1                | 12                   |                  |
| 8.1 Behavioral Practice/ Rehearsal                 | 0                                                     | 0                                               | 0                    |                  |                  |                      | 0                | 0                | 0                    |                  |                  |                      |                  |
| 8.6 Generalization of Behavior                     | 0                                                     | 0                                               | 0                    |                  |                  | 3                    | 0                | 0                | 0                    |                  |                  | 3                    |                  |
| <b>13.1 Identification of self as a role model</b> | 0                                                     | 0                                               | 0                    |                  |                  | <b>6</b>             | 0                | 0                | 0                    |                  |                  | <b>6</b>             |                  |
| NA. Information                                    | 0                                                     | 0                                               | 0                    | 3                | 1                | 1                    | 0                | 0                | 0                    | 3                | 1                | 1                    |                  |
| 6.2 Social Comparison                              | 0                                                     | 0                                               | 0                    |                  |                  | 5                    | 0                | 0                | 0                    |                  |                  | 5                    |                  |
| Intrapersonal Behavior Change                      | <b>1.2 Problem Solving (Personal)</b>                 | 0                                               | 0                    | 0                | 0                | 0                    | 0                |                  |                      | <b>32</b>        |                  |                      | <b>25</b>        |
|                                                    | NA. Information                                       | 0                                               | 0                    | 0                |                  |                      |                  |                  |                      | 4                |                  |                      | 5                |
|                                                    | 6.2 Social Comparison                                 | 0                                               | 0                    | 0                |                  |                      |                  | 7                | 2                    | 22               | 7                | 2                    | 16               |
|                                                    | 8.1 Behavioral Practice/Rehearsal                     | 0                                               | 0                    | 0                |                  |                      |                  | 0                | 0                    | 0                |                  |                      |                  |
|                                                    | 4.4 Behavioral Experiments                            | 0                                               | 0                    | 0                |                  |                      |                  | 0                | 0                    | 0                |                  |                      |                  |
|                                                    | 8.6 Generalization of Behavior                        | 0                                               | 0                    | 0                |                  |                      | 0                | 0                | 0                    | 0                |                  |                      | 0                |
|                                                    | 0                                                     | 0                                               | 0                    |                  |                  | 6                    | 0                | 0                | 0                    |                  |                  | 6                    |                  |
|                                                    | <b>1.3 Goal Setting (outcome)</b>                     | 0                                               | 0                    | 0                |                  |                      | <b>16</b>        |                  |                      | <b>16</b>        |                  |                      | <b>16</b>        |
|                                                    | NA. Information                                       | 0                                               | 0                    | 0                |                  |                      | 0                |                  |                      | 0                |                  |                      | 0                |
|                                                    | 12.5 Adding Objects to the Environment                | 0                                               | 0                    | 0                |                  |                      | 0                |                  |                      | 0                |                  |                      | 0                |
|                                                    | 6.1 Demonstration of Behavior                         | 0                                               | 0                    | 0                |                  |                      | 0                | 6                | 2                    | 8                | 6                | 2                    | 8                |
|                                                    | NA. Reflection: writing personal goals                | 0                                               | 0                    | 0                |                  |                      | 0                |                  |                      | 0                |                  |                      | 0                |
|                                                    | Behavioral Practice/Rehearsal                         | 0                                               | 0                    | 0                |                  |                      | 0                |                  |                      | 0                |                  |                      | 0                |
|                                                    | 8.6 Generalization of Behavior                        | 0                                               | 0                    | 0                |                  |                      | 0                |                  |                      | 3                |                  |                      | 3                |
| <b>8.3 Habit Formation</b>                         | 0                                                     | 0                                               | 0                    |                  |                  | <b>31</b>            |                  |                  | <b>31</b>            |                  |                  | <b>31</b>            |                  |
| NA. Information                                    | 0                                                     | 0                                               | 0                    |                  |                  | 0                    |                  |                  | 8                    |                  |                  | 8                    |                  |
| 12.5 Adding Objects to the Environment             | 0                                                     | 0                                               | 0                    |                  |                  | 0                    |                  |                  | 0                    |                  |                  | 0                    |                  |
| 6.1 Demonstration of the Behavior                  | 0                                                     | 0                                               | 0                    |                  |                  | 0                    | 5                | 2                | 15                   | 5                | 2                | 15                   |                  |
| 15.2 Mental Rehearsal                              | 0                                                     | 0                                               | 0                    |                  |                  | 0                    |                  |                  | 0                    |                  |                  | 0                    |                  |
| 1.2 Problem Solving                                | 0                                                     | 0                                               | 0                    |                  |                  | 0                    |                  |                  | 0                    |                  |                  | 0                    |                  |
| 8.1 Behavioral Practice/Rehearsal                  | 0                                                     | 0                                               | 0                    |                  |                  | 0                    |                  |                  | 8                    |                  |                  | 8                    |                  |
| 8.6 Generalization of Behavior                     | 0                                                     | 0                                               | 0                    |                  |                  | 0                    |                  |                  | 0                    |                  |                  | 0                    |                  |
| <b>1.4 Action Planning</b>                         | 0                                                     | 0                                               | 0                    |                  |                  | <b>16</b>            |                  |                  | <b>16</b>            |                  |                  | <b>16</b>            |                  |
| NA. Information                                    | 0                                                     | 0                                               | 0                    |                  |                  | 0                    |                  |                  | 5                    |                  |                  | 5                    |                  |
| 12.5 Adding Objects to the Environment             | 0                                                     | 0                                               | 0                    |                  |                  | 0                    |                  |                  | 0                    |                  |                  | 0                    |                  |
| 1.7 Review Outcome Goals                           | 0                                                     | 0                                               | 0                    |                  |                  | 0                    | 4                | 2                | 8                    | 4                | 2                | 8                    |                  |
| 6.1 Demonstration of Behavior                      | 0                                                     | 0                                               | 0                    |                  |                  | 0                    |                  |                  | 0                    |                  |                  | 0                    |                  |
| 8.1 Behavioral Practice/Rehearsal                  | 0                                                     | 0                                               | 0                    |                  |                  | 0                    |                  |                  | 0                    |                  |                  | 0                    |                  |
| 8.6 Generalization of Behavior                     | 0                                                     | 0                                               | 0                    |                  |                  | 0                    |                  |                  | 3                    |                  |                  | 3                    |                  |
| <b>1.7 Review Outcome Goals</b>                    | 0                                                     | 0                                               | 0                    |                  |                  | <b>16</b>            |                  |                  | <b>16</b>            |                  |                  | <b>16</b>            |                  |
| NA. Information                                    | 0                                                     | 0                                               | 0                    |                  |                  | 0                    |                  |                  | 5                    |                  |                  | 5                    |                  |
| 12.5 Adding Objects to the Environment             | 0                                                     | 0                                               | 0                    |                  |                  | 0                    |                  |                  | 0                    |                  |                  | 0                    |                  |
| 1.6 Discrepancy Between Current Behavior           | 0                                                     | 0                                               | 0                    |                  |                  | 0                    | 2                | 1                | 7                    | 2                | 1                | 7                    |                  |
| NA. Reflection: Adjust goals & plans               | 0                                                     | 0                                               | 0                    |                  |                  | 0                    |                  |                  | 0                    |                  |                  | 0                    |                  |
| 6.1 Demonstration of Behavior                      | 0                                                     | 0                                               | 0                    |                  |                  | 0                    |                  |                  | 0                    |                  |                  | 0                    |                  |
| 8.1 Behavioral Practice/Rehearsal                  | 0                                                     | 0                                               | 0                    |                  |                  | 0                    |                  |                  | 0                    |                  |                  | 0                    |                  |
| 8.6 Generalization of Behavior                     | 0                                                     | 0                                               | 0                    |                  |                  | 0                    |                  |                  | 4                    |                  |                  | 4                    |                  |
| Physical Activity Protocol                         | <b>8.1 Behavior Practice/Rehearsal</b>                |                                                 |                      | <b>451</b>       |                  |                      | <b>451</b>       |                  |                      | <b>451</b>       |                  |                      | <b>451</b>       |
|                                                    | 4.1 Instruction on how to perform behavior            |                                                 |                      | 41               |                  |                      | 41               |                  |                      | 41               |                  |                      | 41               |
|                                                    | 3.2 Social Support (practical)*                       | 8                                               | 8                    | 16               |                  |                      | 16               |                  |                      | 16               |                  |                      | 16               |
|                                                    | 6.1 Demonstrating of the behavior                     |                                                 |                      | 41               | 8                | 8                    | 41               |                  |                      | 41               | 8                | 8                    | 41               |
|                                                    | 8.1 Behavior Practice/Rehearsal                       |                                                 |                      | 315              |                  |                      | 315              |                  |                      | 315              |                  |                      | 315              |
|                                                    | 8.6 Generalization of Otogo Exercises                 |                                                 |                      | 38               |                  |                      | 38               |                  |                      | 38               |                  |                      | 38               |
| Physical Activity Monitor                          | <b>2.3 Self monitoring of behavior</b>                |                                                 |                      | <b>25</b>        |                  |                      | <b>25</b>        |                  |                      | <b>25</b>        |                  |                      | <b>25</b>        |
|                                                    | NA. Information                                       | 8                                               | 8                    | 10               |                  |                      | 10               | 8                | 8                    | 10               | 8                | 8                    | 10               |
|                                                    | 12.5 Adding objects to the environment                |                                                 |                      | 15               |                  |                      | 15               |                  |                      | 15               |                  |                      | 15               |
| Attention Control Content                          | <b>Technical Questions Health and Wellness Topics</b> |                                                 |                      | <b>76</b>        |                  |                      | <b>76</b>        |                  |                      | <b>76</b>        |                  |                      | <b>10</b>        |
|                                                    | 5.1 Information about health consequences             | 7                                               | 7                    | 135              | 0                | 0                    | 0                | 0                | 0                    | 0                | 0                | 0                    | 0                |
|                                                    | 9.3 Comparative Imagining of future outcome           | 1                                               | 1                    | 10               | 0                | 0                    | 0                | 0                | 0                    | 0                | 0                | 0                    | 0                |
|                                                    |                                                       | 1                                               | 1                    | 10               | 0                | 0                    | 0                | 0                | 0                    | 0                | 0                | 0                    | 0                |
| <b>Total Intervention Dosage Amounts</b>           |                                                       |                                                 |                      | <b>687</b>       |                  |                      | <b>667</b>       |                  |                      | <b>663</b>       |                  |                      | <b>698</b>       |
